# Supplementary material for: Environment and Local Substrate Availability Effects on Harem Formation in a Polygynous Bark Beetle
Source: PubMed Central journal article supplement (PMC7912661; doi:10.3390/insects12020098), 2021-01-24
Supplement: insects-12-00098-s001.pdf [file insects-12-00098-s001.pdf]

## SUPPLEMENTARY MATERIAL

**Table S1.** Top generalised linear mixed models identified using model selection with AIC<sub>c</sub> values for predicting the harem size (females per male) of *Ips grandicollis* bark beetles. The random effect was the log ID number. Marginal R<sup>2</sup> = 0.014, conditional R<sup>2</sup> = 0.014.

| <b>Model components</b>                       | <b>DF</b> | <b>AIC<sub>c</sub></b> | <b>ΔAIC<sub>c</sub></b> | <b>w<sub>i</sub></b> |
|-----------------------------------------------|-----------|------------------------|-------------------------|----------------------|
| <b>HS ~ Enviro</b>                            | 3         | 8508.4                 | 0                       | 0.393                |
| <b>HS ~ Enviro + TSA + Enviro* TSA</b>        | 5         | 8509.9                 | 1.6                     | 0.180                |
| <b>HS ~ Resources + Enviro</b>                | 4         | 8510.4                 | 2.0                     | 0.144                |
| <b>HS ~ Enviro + DNH + Enviro * DNH</b>       | 5         | 8511.2                 | 2.8                     | 0.096                |
| <b>HS ~ Resources + Enviro +TSA</b>           | 5         | 8511.3                 | 2.9                     | 0.056                |
| <b>HS ~ Resources + Enviro + Resources *</b>  | 5         | 8512.3                 | 3.9                     | 0.039                |
| <b>Enviro</b>                                 |           |                        |                         |                      |
| <b>HS ~ Resources + Enviro +TSA + DNH</b>     | 6         | 8513.0                 | 4.6                     | <0.0001              |
| <b>HS ~ Resources + TSA + Resources * TSA</b> | 5         | 8532.7                 | 24.3                    | <0.0001              |
| <b>HS ~ TSA</b>                               | 3         | 8534.9                 | 26.5                    | <0.0001              |
| <b>Null model</b>                             | 2         | 8535.5                 | 27.1                    | <0.0001              |
| <b>HS ~ DNH</b>                               | 3         | 8537.1                 | 28.7                    | <0.0001              |
| <b>HS ~ Resources</b>                         | 3         | 8537.4                 | 29.1                    | <0.0001              |
| <b>HS ~ DNH + TSA + DNH * TSA</b>             | 5         | 8537.9                 | 29.6                    | <0.0001              |
| <b>HS ~ Resources + DNH + Resources * DNH</b> | 5         | 8540.8                 | 32.3                    | <0.0001              |

*HS* = Harem size, *Enviro* = environment (harvested or unharvested plantation),

*Resources* = resource size (10 logs or 5 logs), *TSA* = total surface area of log (m<sup>2</sup>), *DNH* = distance to the nearest harem.

**Table S2.** Model selection using AIC<sub>c</sub> values for GLMM predicting the total number of *Ips grandicollis* bark beetles per log. The random effect was the tree ID number (the tree the logs were cut from). Marginal R<sup>2</sup> = 0.115, conditional R<sup>2</sup> = 0.267.

| <b>Model components</b>                 | <b>DF</b> | <b>AIC<sub>c</sub></b> | <b>ΔAIC<sub>c</sub></b> | <b>w<sub>i</sub></b> |
|-----------------------------------------|-----------|------------------------|-------------------------|----------------------|
| <b>Total ~ Enviro * Resources + TSA</b> | 6         | 1877.34                | 0                       | 0.8504               |
| <b>+ Enviro + Resources</b>             |           |                        |                         |                      |
| <b>Total ~ Resources + TSA</b>          | 4         | 1881.98                | 4.6379                  | 0.0837               |
| <b>Total ~ Enviro + Resources + TSA</b> | 5         | 1882.45                | 5.1124                  | 0.0660               |
| <b>Total~Enviro * Resources +</b>       | 5         | 1930.05                | 52.7113                 | <0.0001              |
| <b>Enviro + Resources</b>               |           |                        |                         |                      |
| <b>Total ~ Resources</b>                | 3         | 1937.66                | 60.3155                 | <0.0001              |
| <b>Total ~ Enviro + Resources</b>       | 4         | 1938.38                | 61.0337                 | <0.0001              |
| <b>Total ~ TSA</b>                      | 3         | 1942.11                | 64.7712                 | <0.0001              |
| <b>Total ~ Enviro + TSA</b>             | 4         | 1943.16                | 65.8149                 | <0.0001              |
| <b>Null model</b>                       | 2         | 1991.30                | 113.8237                | <0.0001              |
| <b>Total ~ Enviro</b>                   | 3         | 1992.30                | 114.9605                | <0.0001              |

*Total* = sum of males and females on each log, *Enviro* = environment (harvested or unharvested plantation), *Resources* = resource size (10 logs or 5 logs), *TSA* = total surface area of logs (m<sup>2</sup>).

**Table S3.** Model selection using AICc values for GLMM predicting the distance to the nearest harem (male nuptial chamber). The random effect was the log ID number.

| <b>Model components</b>                                        | <b>DF</b> | <b>AICc</b> | <b>ΔAICc</b> | <b>w<sub>i</sub></b> |
|----------------------------------------------------------------|-----------|-------------|--------------|----------------------|
| <b>DNH ~ Resources</b>                                         | 4         | -10078.6    | 0            | 0.9551               |
| <b>DNH ~ Resources + TSA</b>                                   | 5         | -10072.4    | 6.2054       | 0.0429               |
| <b>DNH ~ Resources + Enviro</b>                                | 5         | -10066.2    | 12.4643      | 0.0018               |
| <b>DNH ~ Resources + Enviro + TSA</b>                          | 6         | -10059.7    | 18.9248      | <0.0001              |
| <b>DNH ~ Resources + Enviro + TSA +<br/>Enviro * Resources</b> | 6         | -10054.1    | 24.5480      | <0.0001              |
| <b>Null model</b>                                              | 3         | -10051.1    | 27.4934      | <0.0001              |
| <b>DNH ~ Resources + Enviro</b>                                | 7         | -10047.6    | 30.9945      | <0.0001              |
| <b>DNH ~ TSA</b>                                               | 4         | -10045.7    | 32.8986      | <0.0001              |
| <b>DNH ~ Enviro</b>                                            | 4         | -10038.2    | 40.3955      | <0.0001              |
| <b>DNH ~ Enviro + TSA</b>                                      | 5         | -10032.6    | 46.0244      | <0.0001              |

*DNH* = distance to the nearest harem, *Enviro* = environment (harvested or unharvested plantation), *Resources* = resource size (10 logs or 5 logs), *TSA* = total surface area of log (m<sup>2</sup>).

**Table S4.** Model selection using AICc values for GLMM predicting the density of males on each log (males per m<sup>2</sup>). The random effect was the replicate (i.e. the log pile number).

| <b>Model components</b>                           | <b>DF</b> | <b>AICc</b> | <b>ΔAICc</b> | <b>w<sub>i</sub></b> |
|---------------------------------------------------|-----------|-------------|--------------|----------------------|
| <b>Density ~ Resources + Enviro + Resources *</b> | 6         | 1347.77     | 0            | 0.9562               |
| <b>Enviro</b>                                     |           |             |              |                      |
| <b>Density ~ Resources + Enviro</b>               | 5         | 1354.29     | 6.5224       | 0.0367               |
| <b>Density ~ Resources</b>                        | 4         | 1357.57     | 9.8045       | 0.0071               |
| <b>Density ~ Enviro</b>                           | 4         | 1370.89     | 23.1157      | <0.0001              |
| <b>Null model</b>                                 | 3         | 1374.20     | 26.4271      | <0.0001              |

*Density* = males per m<sup>2</sup>, *Enviro* = environment (harvested or unharvested plantation),

*Resources* = resource size (10 logs or 5 logs).

**Table S5.** Mean proximity index (PI) of females in each harem size in harvested and unharvested environments.

| <b>Number of females</b> | <b>Environment</b> | <b>N</b> | <b>Mean PI</b> | <b>p</b> |
|--------------------------|--------------------|----------|----------------|----------|
| <b>3</b>                 | Harvested          | 319      | 0.1974         | 0.3954   |
|                          | Unharvested        | 410      | 0.1822         | 0.3708   |
| <b>4</b>                 | Harvested          | 483      | 0.2255         | 0.3574   |
|                          | Unharvested        | 348      | 0.2055         | 0.3056   |
| <b>5</b>                 | Harvested          | 211      | 0.2098         | 0.2194   |
|                          | Unharvested        | 132      | 0.2142         | 0.2481   |
| <b>6</b>                 | Harvested          | 25       | 0.2059         | 0.2188   |
|                          | Unharvested        | 33       | 0.1653         | 0.1204   |
| <b>7</b>                 | Harvested          | 3        | 0.2288         | 0.2864   |
|                          | Unharvested        | 6        | 0.1728         | 0.1415   |

**Table S6.** Mean proximity index (PI) of females in each harem size in high (10 logs) and low (5 logs) experimental resource availability.

| <b>Number of females</b> | <b>Resources</b> | <b>N</b> | <b>Mean PI</b> | <b>p</b> |
|--------------------------|------------------|----------|----------------|----------|
| <b>3</b>                 | 5 logs           | 268      | 0.199          | 0.3973   |
|                          | 10 logs          | 458      | 0.1829         | 0.3702   |
| <b>4</b>                 | 5 logs           | 325      | 0.2102         | 0.3234   |
|                          | 10 logs          | 506      | 0.2216         | 0.3534   |
| <b>5</b>                 | 5 logs           | 121      | 0.1983         | 0.1899   |
|                          | 10 logs          | 222      | 0.2187         | 0.2575   |
| <b>6</b>                 | 5 logs           | 17       | 0.2781         | 0.4858   |
|                          | 10 logs          | 41       | 0.2056         | 0.2190   |
| <b>7</b>                 | 5 logs           | 4        | 0.2307         | 0.2889   |
|                          | 10 logs          | 5        | 0.1424         | 0.0653   |

**Table S7.** Mean minimum distance between two females in each harem size in harvested and unharvested environments.

| <b>Number of females</b> | <b>Environment</b> | <b>N</b> | <b>Mean min distance</b> | <b>p</b> |
|--------------------------|--------------------|----------|--------------------------|----------|
| <b>2</b>                 | Harvested          | 128      | 3.33                     | 0.7498   |
|                          | Unharvested        | 255      | 3.54                     | 0.7500   |
| <b>3</b>                 | Harvested          | 319      | 2.22                     | 0.6205   |
|                          | Unharvested        | 410      | 2.30                     | 0.6205   |
| <b>4</b>                 | Harvested          | 483      | 1.71                     | 0.5709   |
|                          | Unharvested        | 348      | 1.79                     | 0.5710   |
| <b>5</b>                 | Harvested          | 211      | 1.29                     | 0.4079   |
|                          | Unharvested        | 132      | 1.30                     | 0.4080   |
| <b>6</b>                 | Harvested          | 25       | 1.06                     | 0.4646   |
|                          | Unharvested        | 33       | 1.01                     | 0.4646   |
| <b>7</b>                 | Harvested          | 3        | 0.60                     | 0.4744   |
|                          | Unharvested        | 6        | 0.78                     | 0.4745   |

**Table S8.** Mean minimum distance between two females in each harem size in high (10 logs) and low (5 logs) experimental resource availability.

| <b>Number of females</b> | <b>Resources</b> | <b>N</b> | <b>Mean PI</b> | <b>p</b> |
|--------------------------|------------------|----------|----------------|----------|
| <b>2</b>                 | 5 logs           | 140      | 3.39           | 0.7498   |
|                          | 10 logs          | 243      | 3.51           | 0.7499   |
| <b>3</b>                 | 5 logs           | 268      | 2.26           | 0.6206   |
|                          | 10 logs          | 458      | 2.27           | 0.6206   |
| <b>4</b>                 | 5 logs           | 325      | 1.78           | 0.5710   |
|                          | 10 logs          | 506      | 1.72           | 0.5709   |
| <b>5</b>                 | 5 logs           | 121      | 1.30           | 0.4080   |
|                          | 10 logs          | 222      | 1.28           | 0.4079   |
| <b>6</b>                 | 5 logs           | 17       | 1.05           | 0.4646   |
|                          | 10 logs          | 41       | 1.02           | 0.446    |
| <b>7</b>                 | 5 logs           | 4        | 0.65           | 0.4744   |
|                          | 10 logs          | 5        | 0.78           | 0.4745   |
